# Supplementary material
Source: PubMed Central journal article supplement (PMC3685252)
Supplement: AEM.03996-12_zam999104366so1.pdf [file AEM.03996-12_zam999104366so1.pdf]

**Table S1.** Bacterial strains and plasmids.

| Strains or plasmid | Relevant characteristics                                   | Source or reference     |
|--------------------|------------------------------------------------------------|-------------------------|
| <i>E. coli</i> K12 |                                                            |                         |
| JW0764-2           | <i>moaA753</i> (del)::kan                                  | Baba <i>et al.</i> (26) |
| JW0765-1           | <i>moaB754</i> (del)::kan                                  | Baba <i>et al.</i> (26) |
| JW0766-1           | <i>moaC755</i> (del)::kan                                  | Baba <i>et al.</i> (26) |
| JW0767-1           | <i>moaD756</i> (del)::kan                                  | Baba <i>et al.</i> (26) |
| JW0768-1           | <i>moaE757</i> (del)::kan                                  | Baba <i>et al.</i> (26) |
| JW0746-1           | <i>modA735</i> (del)::kan                                  | Baba <i>et al.</i> (26) |
| JW0747-1           | <i>modB736</i> (del)::kan                                  | Baba <i>et al.</i> (26) |
| JW0748-2           | <i>modC737</i> (del)::kan                                  | Baba <i>et al.</i> (26) |
| JW0008-5           | <i>mog-729</i> (del)::kan                                  | Baba <i>et al.</i> (26) |
| JW3901-1           | <i>menA789</i> (del)::kan                                  | Baba <i>et al.</i> (26) |
| JW2256-1           | <i>menC743</i> (del)::kan                                  | Baba <i>et al.</i> (26) |
| JW5374-5           | <i>menD746</i> (del)::kan                                  | Baba <i>et al.</i> (26) |
| JW2255-1           | <i>menE742</i> (del)::kan                                  | Baba <i>et al.</i> (26) |
| JW1328-1           | <i>fnr-771</i> (del)::kan                                  | Baba <i>et al.</i> (26) |
| JW5580-1           | <i>tatB780</i> (del)::kan                                  | Baba <i>et al.</i> (26) |
| JW3815-1           | <i>tatC781</i> (del)::kan                                  | Baba <i>et al.</i> (26) |
| JW2875-1           | <i>ubiH758</i> (del)::kan                                  | Baba <i>et al.</i> (26) |
| ECMOAC             | JW0764-2 containing pECA27, Ap <sup>r</sup>                | This study              |
| ECMODC             | JW0746-1 containing pECD25, Ap <sup>r</sup>                | This study              |
| ECMOGC             | JW0008-5 containing pECG07, Ap <sup>r</sup>                | This study              |
| Plasmids           |                                                            |                         |
| pCR2.1-TOPO        | Cloning vector, Ap <sup>r</sup>                            | Invitrogen              |
| pECA27             | 2.7 kb <i>moaABCDE</i> PCR product cloned into pCR2.1-TOPO | This study              |
| pECD25             | 2.5 kb <i>modABC</i> PCR product cloned into pCR2.1-TOPO   | This study              |
| pECG07             | 0.7 kb <i>mog</i> PCR product cloned into pCR2.1-TOPO      | This study              |
